# Supplementary material for: Phase transition and superconductivity of selenium under pressure
Source: Royal Society of Chemistry journal article supplement (doi:10.1039/d4cp04078c), 2025-01-01
Supplement: d4cp04078c1.pdf [file d4cp04078c1.pdf]

## Supplementary materials for “Phase transition and superconductivity of selenium under pressure”

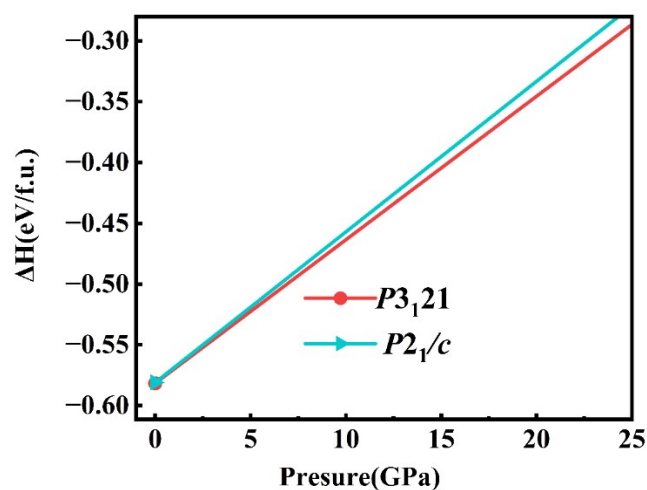

**Figure S1.** Enthalpy vs pressure curves for selenium with respect to  $I4/mmm$  phase and across the pressure range of 0-25 GPa.

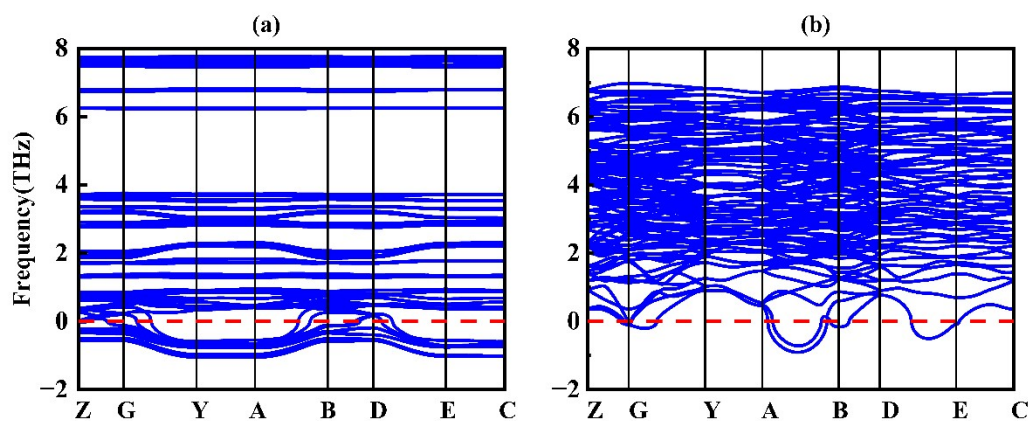

**Figure S2.** Phonon dispersion curves for  $P2_1/c$  phase of selenium at pressure of (a) 0 and (b) 25 GPa, respectively.
